# Supplementary material
Source: PubMed Central journal article supplement (PMC7100324)
Supplement: 41385_2015_BFmi2014129_MOESM426_ESM.pdf [file 41385_2015_BFmi2014129_MOESM426_ESM.pdf]

## Online Data Supplement

**The Axl receptor tyrosine kinase is a discriminator of macrophage function in the inflamed lung.**

T Fujimori, AM Grabiec, M Kaur, TJ Bell, N Fujino, PC Cook, FR Svedberg, AS MacDonald, RA Maciewicz, D Singh and T Hussell

This file contains supplementary figures and figure legends S1-S2.

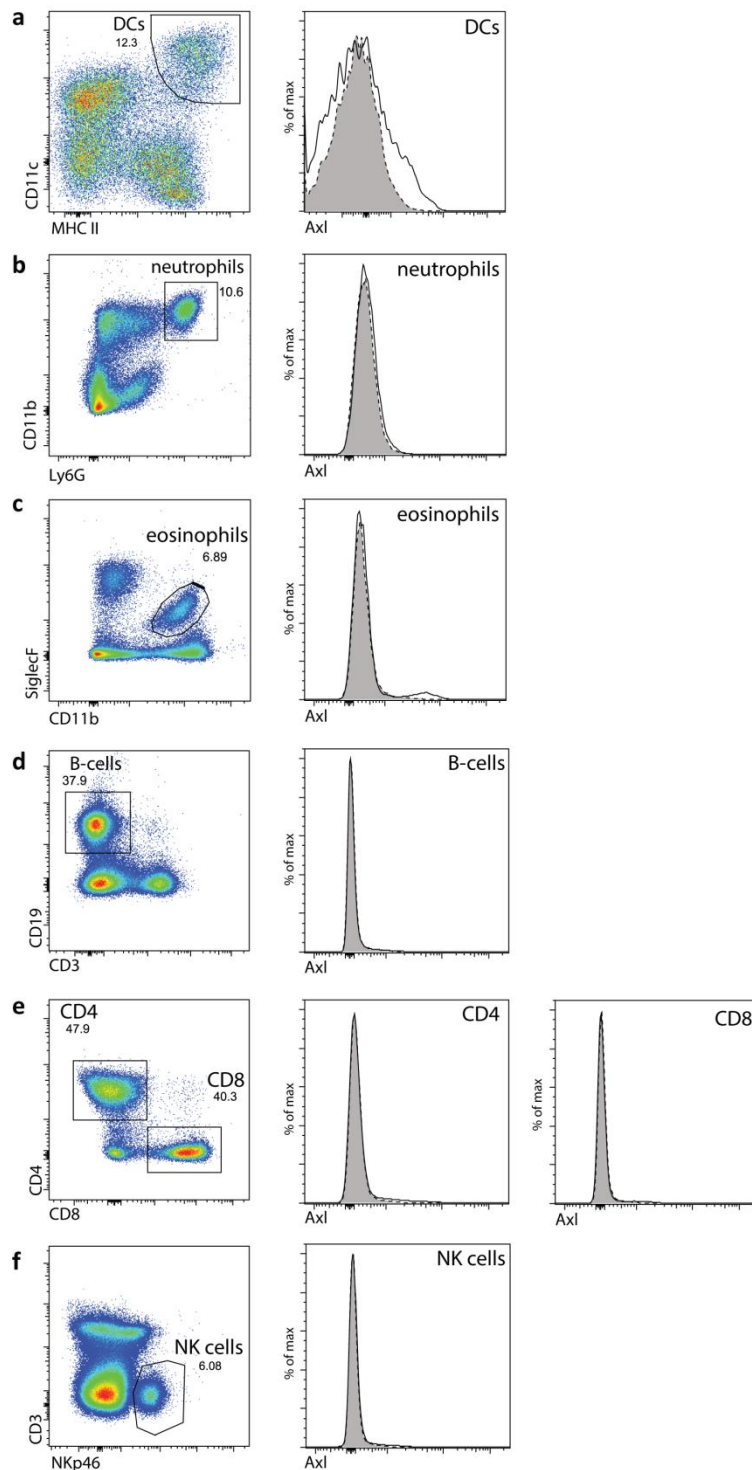

**Supplementary figure S1.** Under homeostatic conditions Axl is not expressed by myeloid cells or lymphocytes in the lung except for airway macrophages. Flow cytometric analysis of Axl expression on (a) dendritic cells (b) neutrophils (c) eosinophils (d) B-cells (e) CD4<sup>+</sup> and CD8<sup>+</sup> T-cells (f) natural killer cells isolated from dissociated lung tissue. Specific staining, solid line/open. Isotype control, dotted line/shaded.

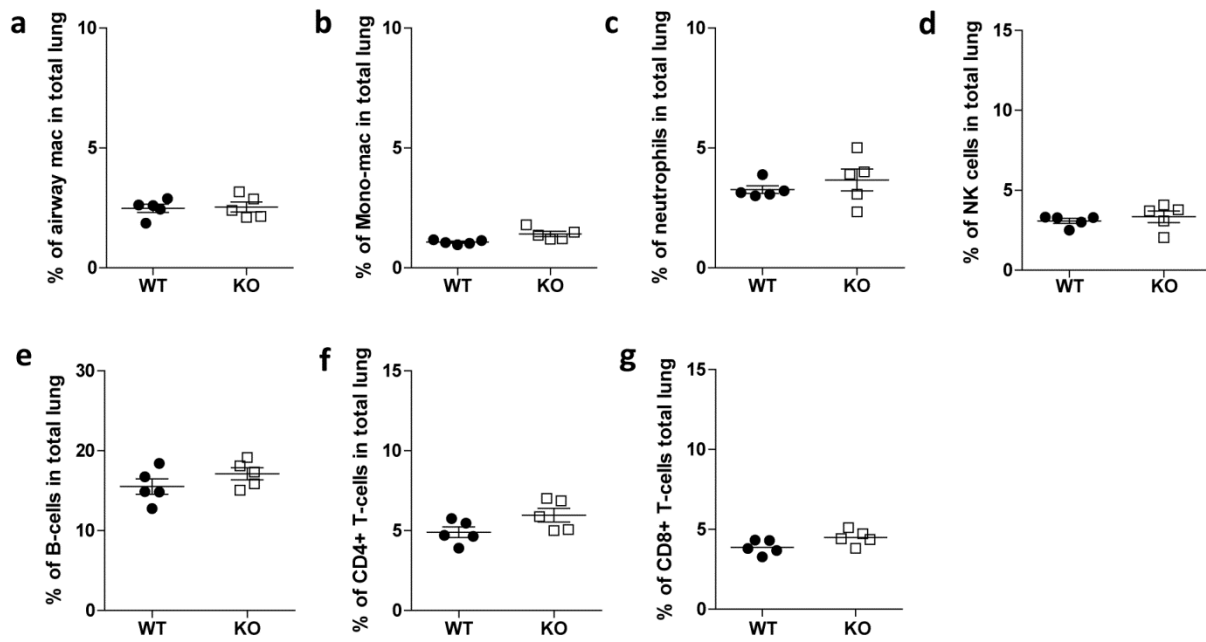

**Supplementary figure S2:** No difference in cellular composition of the lung immune system between wild type and  $Axl^{-/-}$  mice at homeostasis. Flow cytometric analysis of the percentage of (a) airway macrophages (b) monocyte-macrophages (c) neutrophils (d) NK cells (e) B-cells (f) CD4<sup>+</sup> T-cells (g) CD8<sup>+</sup> T-cells in the total lung from WT (closed symbol) and  $Axl^{-/-}$  (open symbol) mice at homeostasis. Data are representative of two independent experiments with 5 mice each.
